# Supplementary material for: Sulfur depletion through repetitive redox cycling unmasks the role of the cryptic sulfur cycle for (methyl)thioarsenate formation in paddy soils
Source: Royal Society of Chemistry journal article supplement (doi:10.1039/d4em00764f), 2025-01-01
Supplement: d4em00764f1.pdf [file d4em00764f1.pdf]

**Supporting information to**

**Sulfur depletion through repetitive redox cycling unmasks the role of the  
cryptic sulfur cycle for (methyl)thioarsenate formation in paddy soils**

José M. León Ninin<sup>1\*</sup>, Carolin Dreher<sup>2</sup>, Andreas Kappler<sup>2</sup>, Britta Planer-Friedrich<sup>1‡</sup>

<sup>1</sup> Environmental Geochemistry, Bayreuth Center for Ecology and Environmental Research (BayCEER), University of Bayreuth, 95440 Bayreuth, Germany

<sup>2</sup> Geomicrobiology, Department of Geosciences, University of Tübingen, 72076 Tübingen, Germany

\* Corresponding author. Phone: +49-921-553995; E-mail address: jose.leon-ninin@uni-bayreuth.de (J.M. León Ninin).

‡ Deceased

(8 Pages, 3 Tables, 12 Figures)

## Supplementary Data

**Table S1:** Selected soil properties of the original soil used for the long-term incubation experiment.

| Soil name | Horizon* | Horizon depth (cm)* | Soil pH* | Soil Org. C* (g kg <sup>-1</sup> ) | Soil Fe* (g kg <sup>-1</sup> ) | Soil As** (mg kg <sup>-1</sup> ) | Soil S** (g kg <sup>-1</sup> ) | Fe <sub>o</sub> /Fe <sub>DCB</sub> ** |
|-----------|----------|---------------------|----------|------------------------------------|--------------------------------|----------------------------------|--------------------------------|---------------------------------------|
| P50       | Alp1     | 0 - 7               | 7.4      | 17.8 ± 0.5                         | 38                             | 17                               | 3.52                           | 0.43 ± 0.04                           |

\*Data from Kölbl, Schad (1). \*\*Data from León Ninin, Muehe (2). Oxalate extractable iron (Fe<sub>o</sub>), Dithionate-citrate-bicarbonate extractable iron (Fe<sub>DCB</sub>).

**Table S2:** Parameters collected during Mössbauer spectra analysis.

| Sample        | Phase                                                | CS (mm/s) | QS/ $\epsilon$ (mm/s) | H (T) | $\sigma^*$ | Relative area (%) | $\chi^2$ |
|---------------|------------------------------------------------------|-----------|-----------------------|-------|------------|-------------------|----------|
| C0<br>(77 K)  | Fe <sup>III</sup> <sub>adsorbed</sub> /clays         | 0.46      | 0.72                  |       |            | <b>52.6</b>       | 0.64     |
|               | Fe <sup>II</sup> <sub>total</sub>                    | 1.24      | 2.87                  |       |            | 30.1              |          |
|               | Crystalline Fe <sup>III</sup> (oxyhydr)oxides        | 0.39      | -0.17                 | 52.1  | 3.0        | 17.3              |          |
| C0<br>(5 K)   | Fe(III)/clays                                        | 0.48      | 0.72                  |       |            | <b>45.5</b>       | 0.77     |
|               | Fe <sup>II</sup>                                     | 1.30      | 2.81                  |       |            | 27.2              |          |
|               | Crystalline Fe <sup>III</sup> (oxyhydr)oxides        | 0.49      | -0.08                 | 51.9  | 3.0        | 24.5              |          |
|               | Poorly crystalline Fe <sup>III</sup> (oxyhydr)oxides | 0.35      | -0.14                 | 48.0  | 0.0        | 2.8               |          |
| C10<br>(77 K) | Fe <sup>III</sup> /clays                             | 0.47      | 0.73                  |       |            | <b>52.1</b>       | 0.52     |
|               | Fe <sup>II</sup>                                     | 1.23      | 2.84                  |       |            | 33.6              |          |
|               | Crystalline Fe <sup>III</sup> (oxyhydr)oxides        | 0.53      | -0.071                | 51.9  | 2.2        | 14.3              |          |
| C10<br>(5 K)  | Fe <sup>III</sup> /clays                             | 0.42      | 0.73                  |       |            | <b>53.8</b>       | 0.79     |
|               | Fe <sup>II</sup>                                     | 1.30      | 2.79                  |       |            | 28.0              |          |
|               | Crystalline Fe <sup>III</sup> (oxyhydr)oxides        | 0.53      | -0.072                | 51.9  | 2.2        | 12.8              |          |
|               | Poorly crystalline Fe <sup>III</sup> (oxyhydr)oxides | 0.35      | 0.019                 | 58.4  | 3.0        | 5.4               |          |
| C30<br>(77 K) | Fe <sup>III</sup> /clays                             | 0.44      | 0.71                  |       |            | <b>50.7</b>       | 0.55     |
|               | Fe <sup>II</sup>                                     | 1.24      | 2.84                  |       |            | 32.1              |          |
|               | Crystalline Fe <sup>III</sup> (oxyhydr)oxides        | 0.43      | -0.069                | 51.5  | 2.3        | 17.2              |          |
| C30<br>(77 K) | Fe <sup>III</sup> /clays                             | 0.48      | 0.71                  |       |            | <b>53.3</b>       | 0.83     |
|               | Fe <sup>II</sup>                                     | 1.30      | 2.78                  |       |            | 30.4              |          |
|               | Crystalline Fe <sup>III</sup> (oxyhydr)oxides        | 0.43      | -0.14                 | 51.5  | 2.3        | 9.5               |          |
|               | Poorly crystalline Fe <sup>III</sup> (oxyhydr)oxides | 0.33      | -0.034                | 49.1  | 3.0        | 6.8               |          |

Center shift (CS), quadrupole splitting (QS), hyperfine field (H), sigma, the relative area and the goodness of the fit  $\chi^2$ .

**Table S3:** Relative areas (%) of mineral phases and total Fe content in samples C0, C10, and C30.

| Mineral phase & Fe soil content                      | C0     | C10    | C30    |
|------------------------------------------------------|--------|--------|--------|
| Fe <sup>III</sup> <sub>adsorbed</sub> /clays         | 45.5   | 53.8   | 53.3   |
| Fe <sup>II</sup> <sub>total</sub>                    | 27.2   | 28.0   | 30.4   |
| Crystalline Fe <sup>III</sup> (oxyhydr)oxides        | 24.6   | 12.8   | 9.5    |
| Poorly Crystalline Fe <sup>III</sup> (oxyhydr)oxides | 2.8    | 5.4    | 6.8    |
| Total Fe content (g kg <sup>-1</sup> )               | 33 ± 2 | 27 ± 2 | 23 ± 1 |

Values for Total Fe content in the soil are given as average ± standard deviation (n = 3).

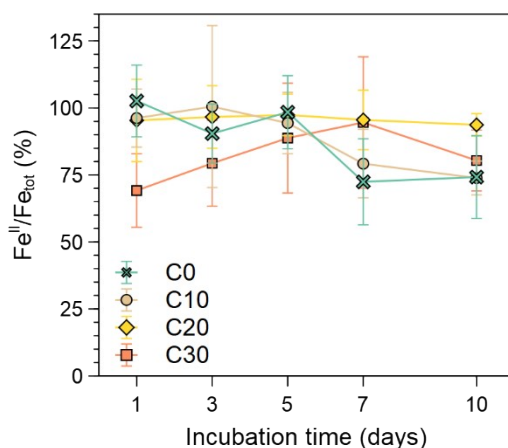

**Figure S1:** Fraction of reduced Fe in total dissolved Fe throughout incubation time for all redox cycled soils. Data points are average values and bars indicate standard deviation ( $n = 3$ ).

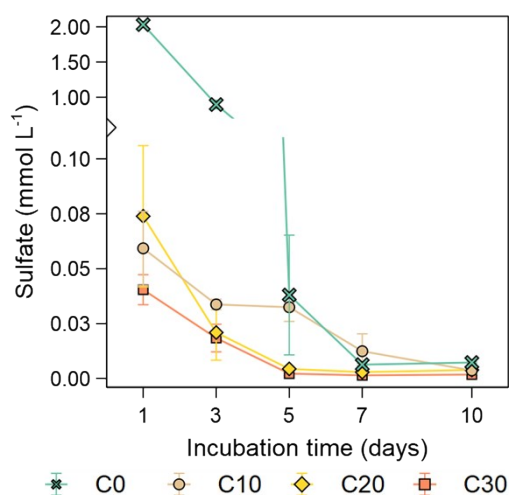

**Figure S2:** Time-resolved sulfate concentrations during the anoxic incubation period for all soils. Data points are average values and bars indicate standard deviation ( $n = 3$ ).

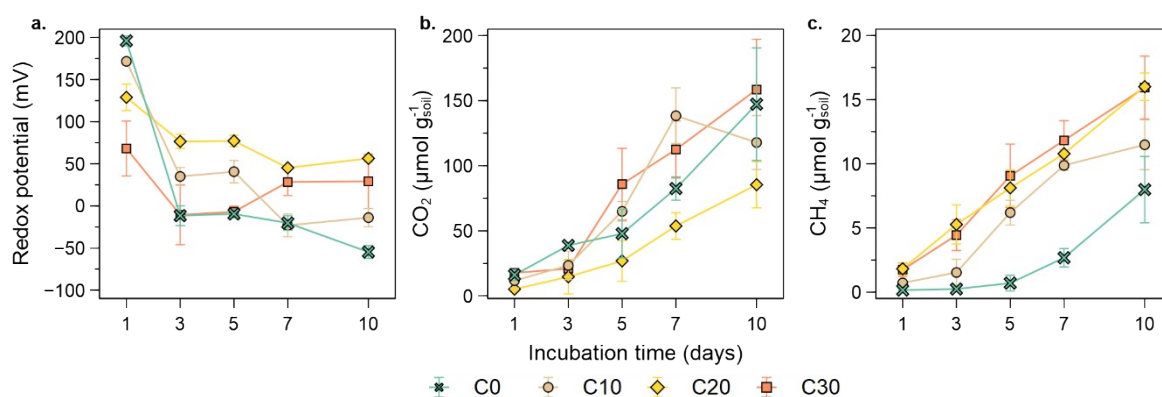

**Figure S3:** Temporal changes on redox potential (a), CO<sub>2</sub> production (b) and CH<sub>4</sub> production (c) for all redox cycled soils. Data points are average values and bars indicate standard deviation ( $n = 3$ ).

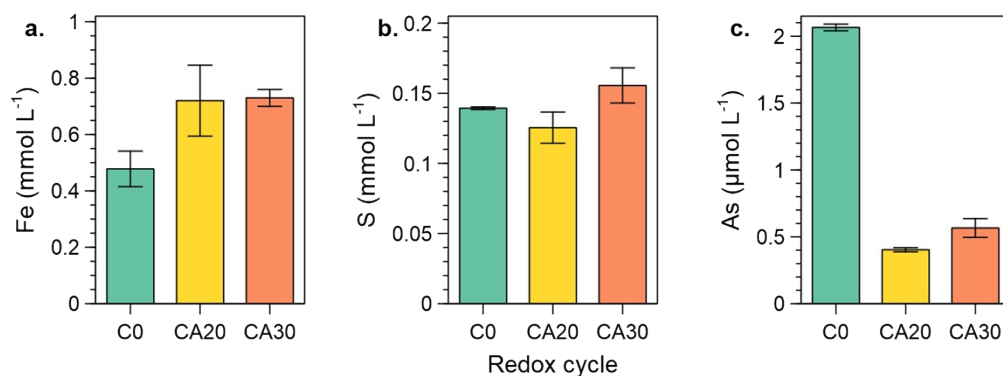

**Figure S4:** Comparison of aqueous phase Fe (a), S (b), and As (c) in C0 and constantly anoxic setups at day 10 of the anoxic cycle. Bar height is the average value, and bars indicate standard deviation (n = 3).

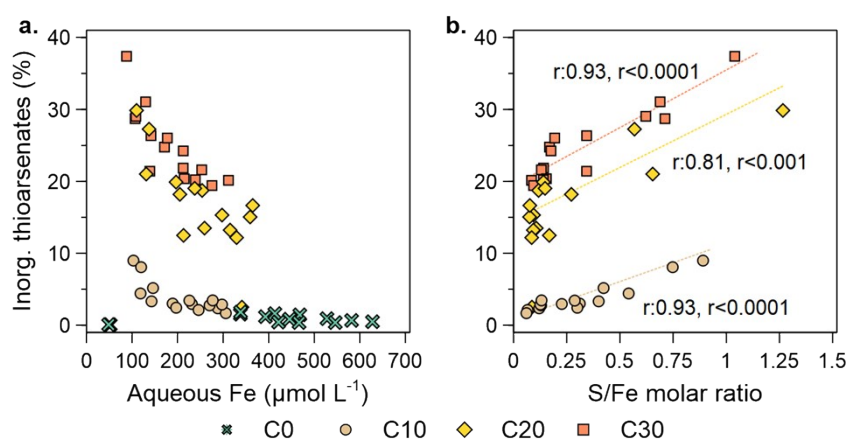

**Figure S5:** Influence of Fe depletion on thioarsenate formation in soils after repeated redox cycling (a) and effect of excess S over Fe on thioarsenate formation for each depleted soil (b).

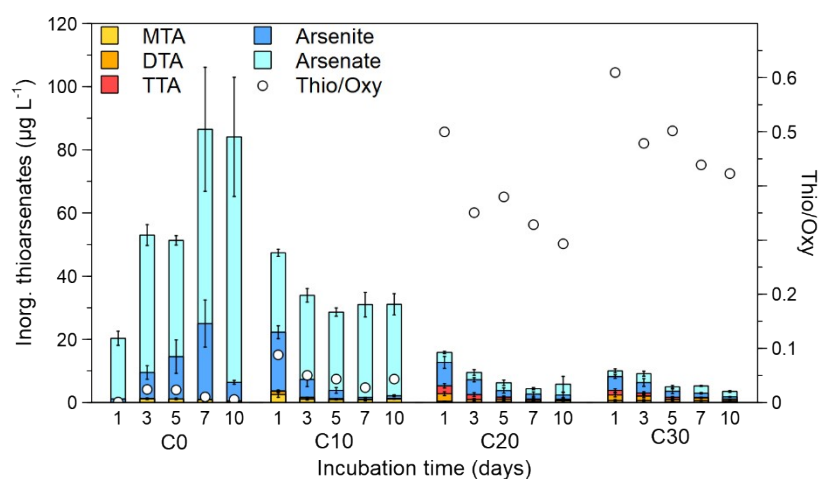

**Figure S6:** Temporal dynamics and contribution of all inorganic arsenic species to total As in the depleted soils.

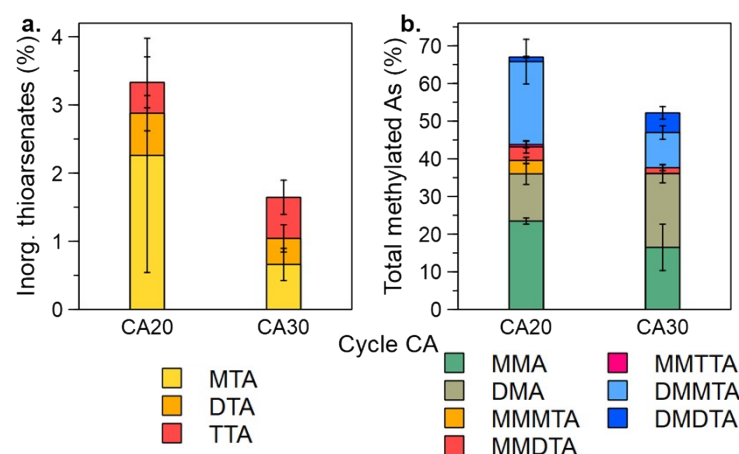

**Figure S7:** Inorganic thioarsenate and methylated As contribution to total As by anoxic incubation day 10 in CA setups.

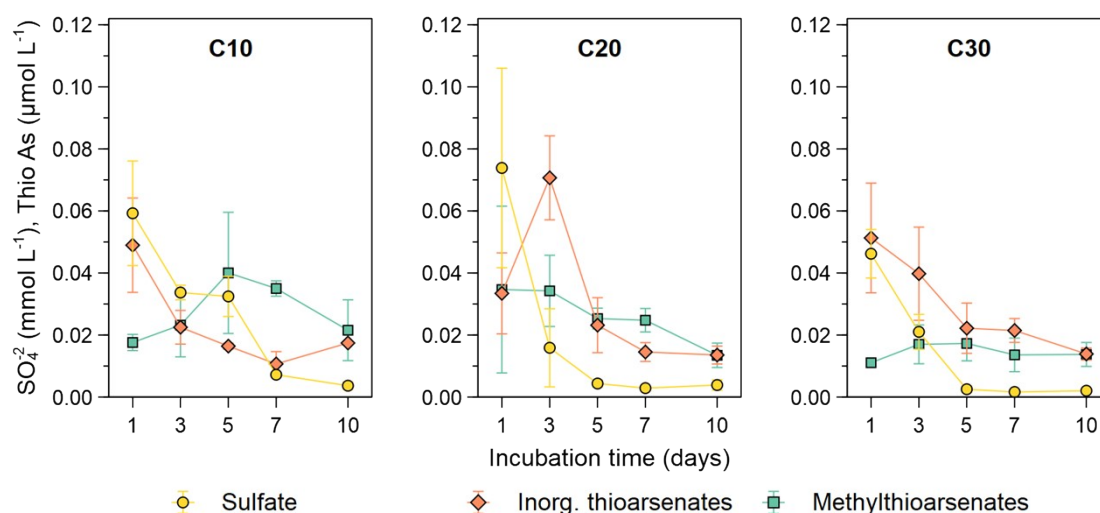

**Figure S8:** Temporal changes of inorganic and methylated thioarsenate concentrations in the soils after repeated redox cycling. Data points are average values and bars indicate standard deviation (n = 3).

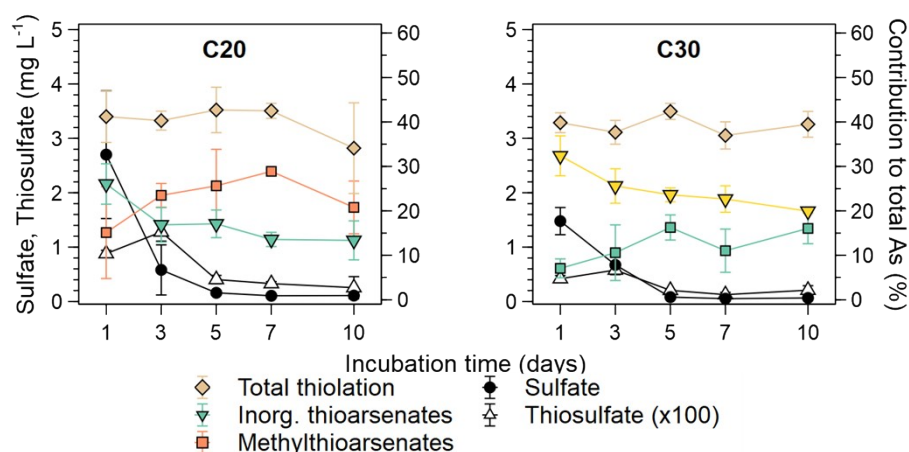

**Figure S9:** Temporal dynamics in the contribution of inorganic, methylated and total thiolated As species, and comparison with aqueous phase S species. Data points are average values and bars indicate standard deviation (n = 3).

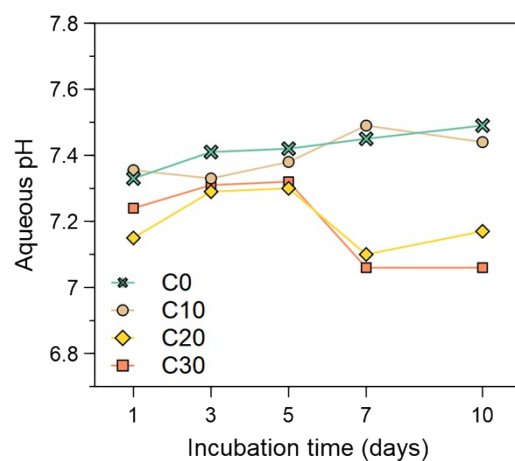

**Figure S10:** Temporal changes in aqueous phase pH with increasing redox cycling. Data points are average values and bars indicate standard deviation ( $n = 3$ ).

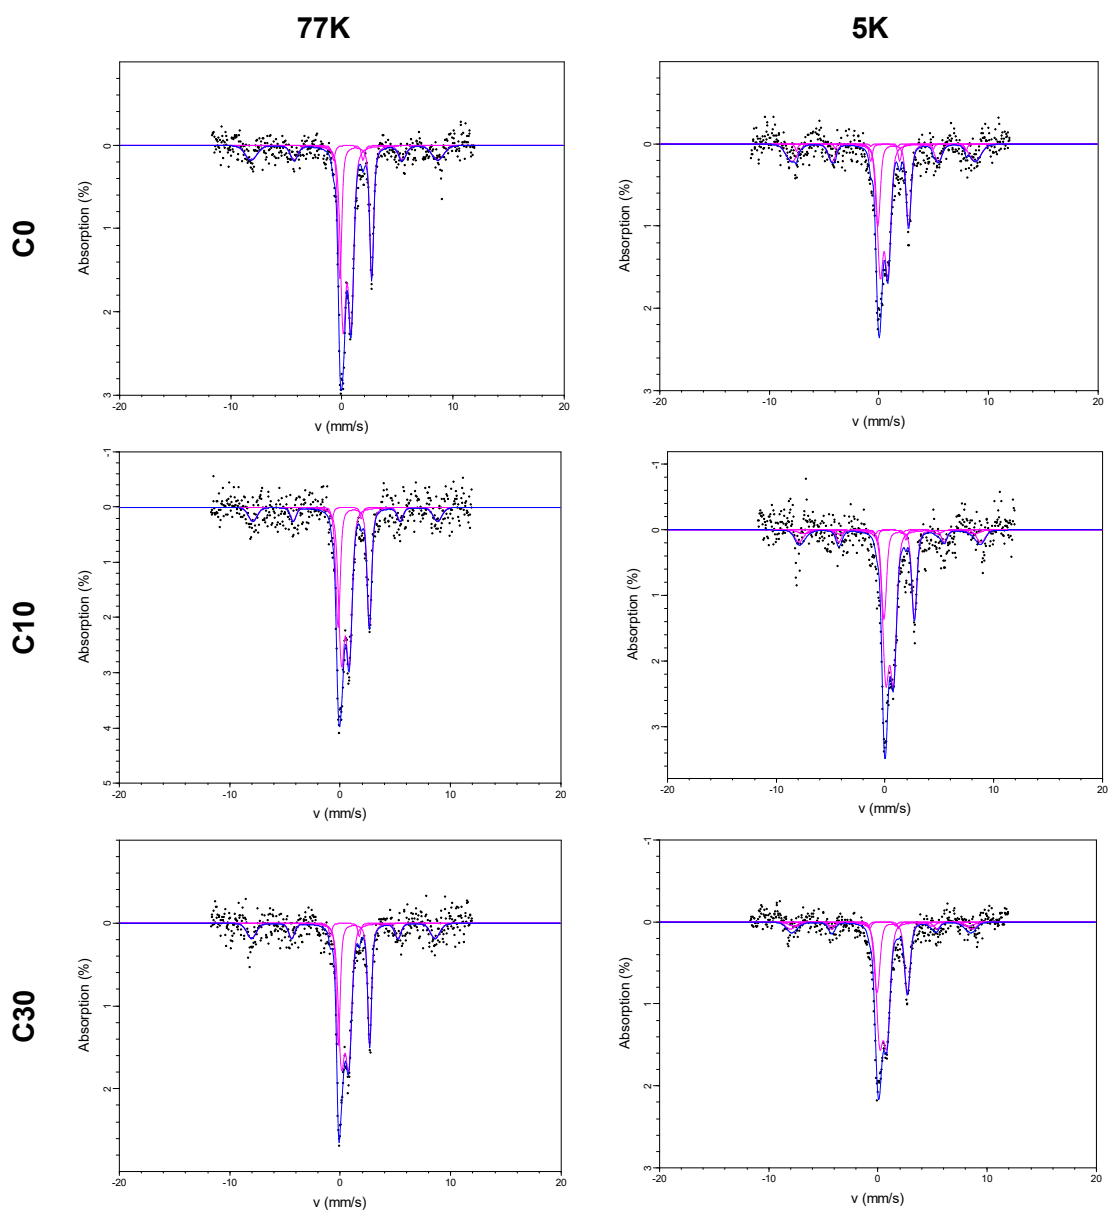

**Figure S11:** Mössbauer spectra and fitting of samples C0, C10, C30. Measurements taken at 77 and 5 K. Black dots show the original measurement. Blue and pink lines are the overall and individual fits, respectively.

## Supplementary Discussion

Due to some uncertainties regarding the mineral phase of the  $\text{Fe}^{\text{II}}$  and the  $\text{Fe}^{\text{III}}$  (oxy)hydroxide, additional  $\mu\text{XRD}$  measurements were carried out (Figure S12). All samples were dominated by quartz. Therefore, some reflections were ambiguous. Other mineral phases found were wüstite ( $\text{Fe}^{\text{II}}\text{O}$ ), siderite ( $\text{Fe}^{\text{II}}\text{CO}_3$ ) and hematite ( $\text{Fe}^{\text{III}}_2\text{O}_3$ ). Wüstite has a very similar pattern to periclase ( $\text{MgO}$ ), so the main  $\text{Fe}^{\text{II}}$  phase was most likely siderite. The  $\mu\text{XRD}$  patterns did not show clear signs of clay minerals. However, the strong signal of quartz might have covered low abundant mineral phases.

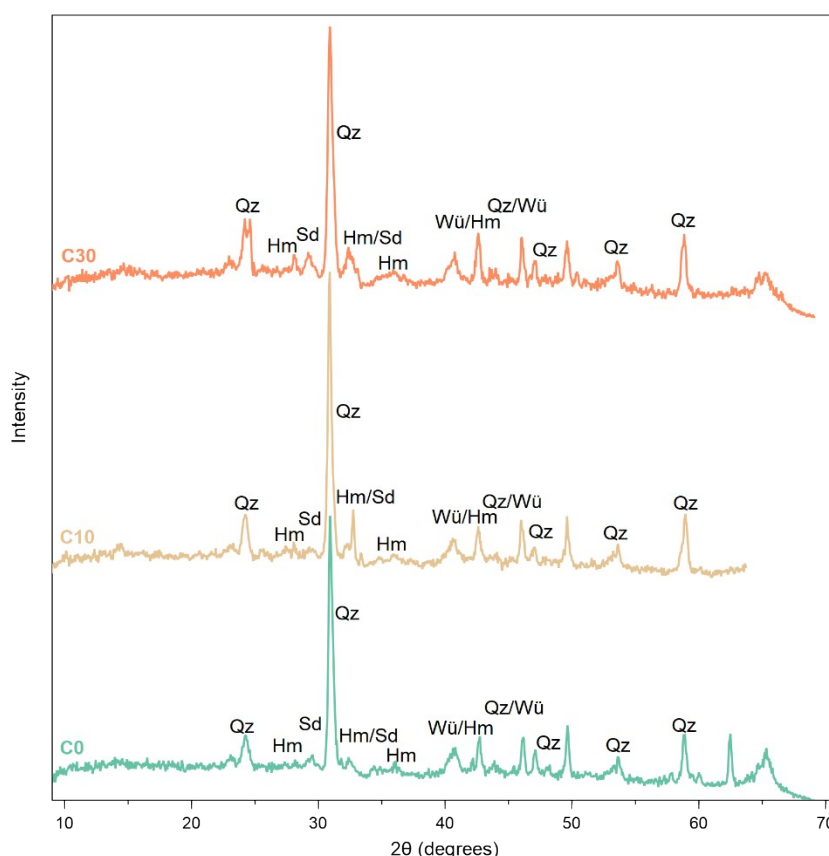

**Figure S12:**  $\mu\text{XRD}$  patterns of C0, C10, and C30 (from bottom to top). Quarz (Qz), Hematite (Hm), Siderite (Sd), Wüstite (Wü).

## Supplementary References

1. Kölbl A, Schad P, Jahn R, Amelung W, Bannert A, Cao ZH, et al. Accelerated soil formation due to paddy management on marshlands (Zhejiang Province, China). *Geoderma*. 2014;228-229:67-89.
2. León Ninin JM, Muehe EM, Kölbl A, Higa Mori A, Nicol A, Gilfedder B, et al. Changes in arsenic mobility and speciation across a 2000-year-old paddy soil chronosequence. *Science of The Total Environment*. 2024;908:168351.
